# Supplementary material for: Plant-Based Alternatives to Cheese Formulated Using Blends of Zein and Chickpea Protein Ingredients
Source: MDPI journal article supplement (doi:10.3390/foods12071492), 2023-04-01
Supplement: s1 [file s1]

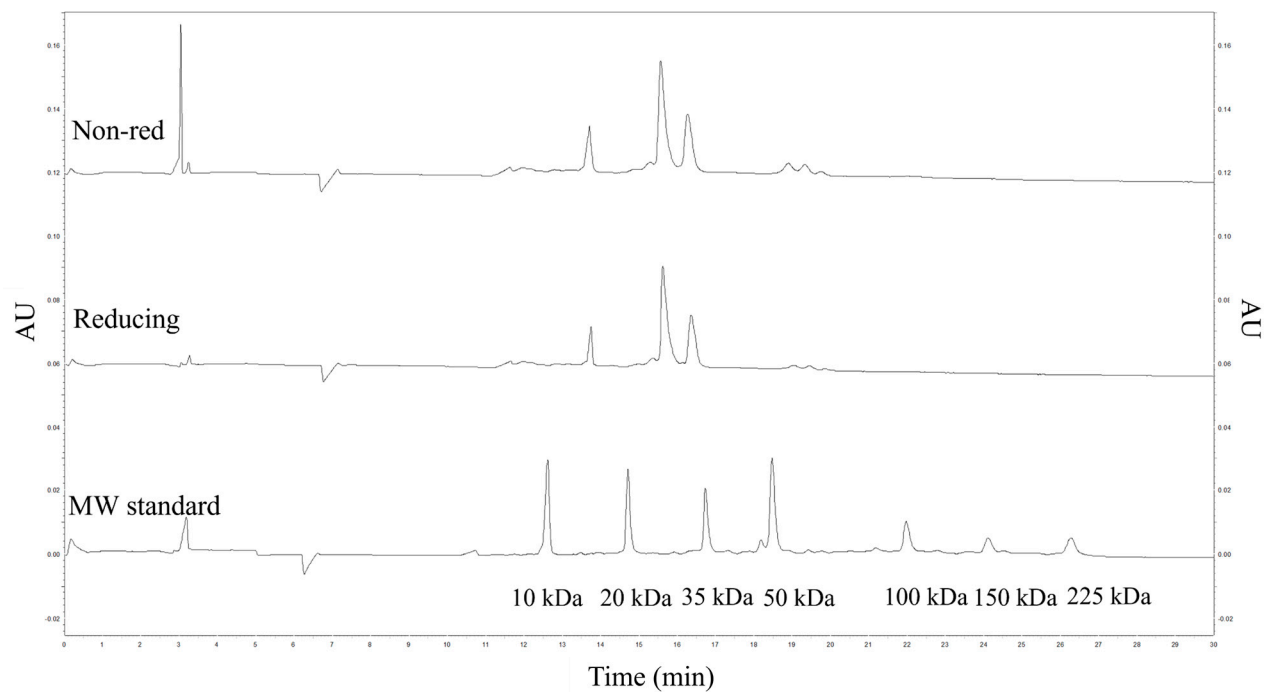

**Figure S1.** Protein profile of zein protein isolate (ZPI) under non reducing and reducing conditions. The bottom electropherogram represents the molecular weight (MW) standard.

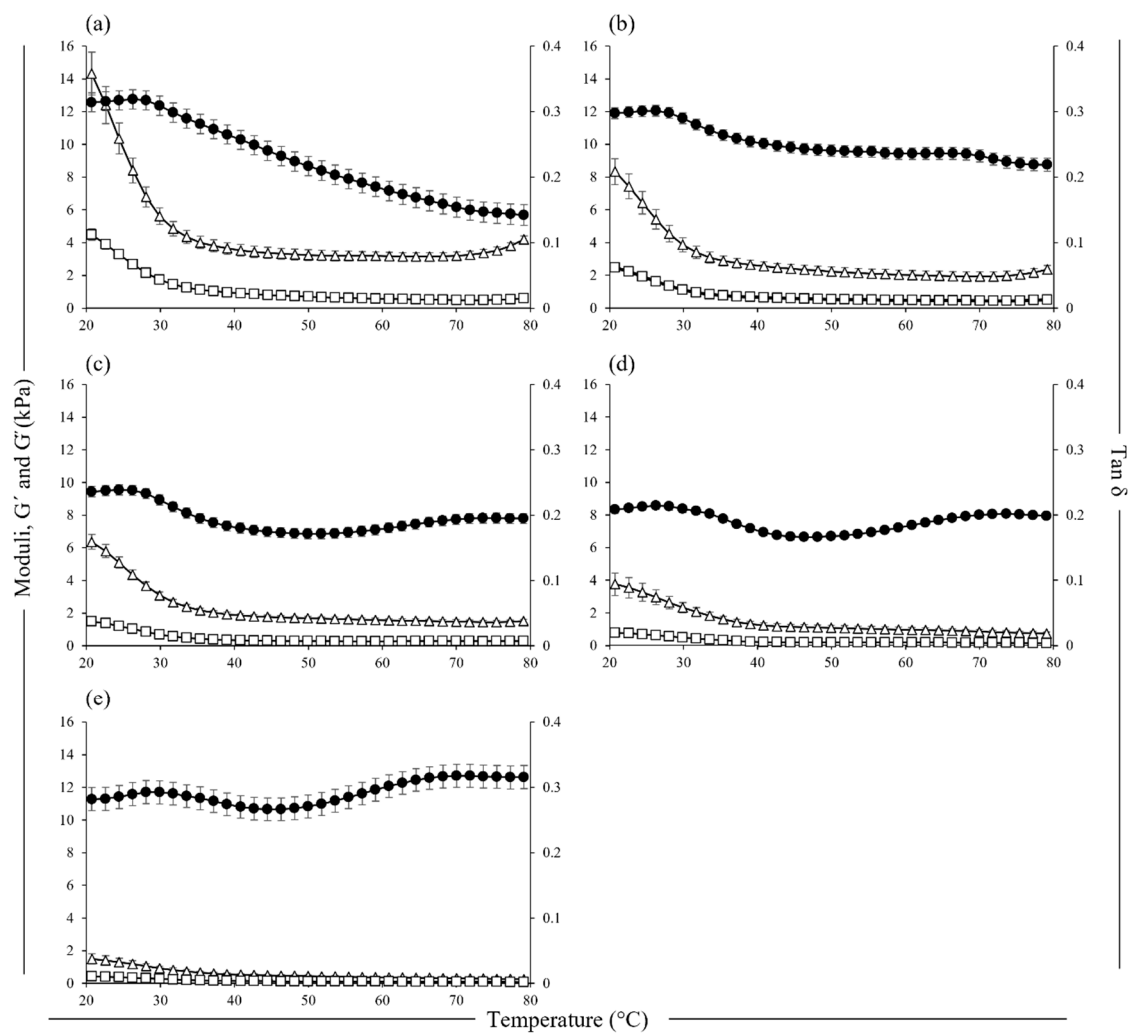

**Figure S2.** Rheological profiles showing storage modulus ( $G'$ ) (open triangle), loss modulus ( $G''$ ) (open square) and loss tangent ( $\tan \delta$ ) (filled circle) as a function of temperature in the range 20–80°C for 0Z-100C (a), 25Z-75C (b), 50Z-50C (c), 75Z-25C (d) and 100Z-100C (e) plant-based cheese alternative samples.
